# Supplementary material
Source: PubMed Central journal article supplement (PMC7205813)
Supplement: bloodBLD2019003347-suppl1.pdf [file bloodBLD2019003347-suppl1.pdf]

**Supplemental Index: Persistent leukocytosis in polycythemia vera is associated with disease evolution but not thrombosis: an analysis from a 520-patient retrospective multi-center database**

**Supplemental Table S1: Summary of goodness-of-fit statistics for 12-month HCT, WBC, and PLT trajectory groups.**

| Optimal number of groups for 12 Month HCT; N=440                                                                                                                                                                                                                               |                  |              |              |              |                | Optimal number of groups for 12 Month WBC; N=440                                                                                                                                                                                                                                                                                   |                  |              |              |              |                | Optimal number of groups for 12 Month Platelet Counts; N=440                                                                                                                                                                            |                  |              |              |              |                |
|--------------------------------------------------------------------------------------------------------------------------------------------------------------------------------------------------------------------------------------------------------------------------------|------------------|--------------|--------------|--------------|----------------|------------------------------------------------------------------------------------------------------------------------------------------------------------------------------------------------------------------------------------------------------------------------------------------------------------------------------------|------------------|--------------|--------------|--------------|----------------|-----------------------------------------------------------------------------------------------------------------------------------------------------------------------------------------------------------------------------------------|------------------|--------------|--------------|--------------|----------------|
| HCT                                                                                                                                                                                                                                                                            | Number of Groups |              |              |              | Selected Model | WBC                                                                                                                                                                                                                                                                                                                                | Number of Groups |              |              |              | Selected Model | Platelet                                                                                                                                                                                                                                | Number of Groups |              |              |              | Selected Model |
|                                                                                                                                                                                                                                                                                | 1                | 2            | 3            | 4            |                |                                                                                                                                                                                                                                                                                                                                    | 1                | 2            | 3            | 4            |                |                                                                                                                                                                                                                                         | 1                | 2            | 3            | 4            |                |
| Log likelihood                                                                                                                                                                                                                                                                 | -5914.9          | -5767.2      | -5660.8      | -5625.6      | -5647.3        | Log likelihood                                                                                                                                                                                                                                                                                                                     | -1449.8          | -1130.2      | -978.4       | -879.5       | -872.6         | Log likelihood                                                                                                                                                                                                                          | -1759.8          | -1412.3      | -1271.4      | -1185.2      | -1271.5        |
| BIC                                                                                                                                                                                                                                                                            | -5927.1          | -5791.6      | -5697.3      | -5674.2      | -5686.9        | BIC                                                                                                                                                                                                                                                                                                                                | -1461.9          | -1154.6      | -1014.9      | -928.2       | -924.3         | BIC                                                                                                                                                                                                                                     | -1771.9          | -1436.7      | -1307.9      | -1233.9      | -1305.0        |
| Entropy                                                                                                                                                                                                                                                                        | -                | 116.35       | 93.72        | 110.79       | 91.00          | Entropy                                                                                                                                                                                                                                                                                                                            | -                | 47.76        | 89.61        | 87.58        | 85.43          | Entropy                                                                                                                                                                                                                                 | -                | 52.37        | 68.74        | 100.98       | 68.95          |
| Entropy (relative)                                                                                                                                                                                                                                                             | -                | 0.62         | 0.81         | 0.82         | 0.81           | Entropy (relative)                                                                                                                                                                                                                                                                                                                 | -                | 0.84         | 0.81         | 0.86         | 0.86           | Entropy (relative)                                                                                                                                                                                                                      | -                | 0.83         | 0.86         | 0.83         | 0.86           |
| Two-group model                                                                                                                                                                                                                                                                | 1                | 2            | 3            | 4            |                | Two-group model                                                                                                                                                                                                                                                                                                                    | 1                | 2            | 3            | 4            |                | Two-group model                                                                                                                                                                                                                         | 1                | 2            | 3            | 4            |                |
| 1. n, 258 (59%)                                                                                                                                                                                                                                                                | <b>0.854</b>     | 0.146        |              |              |                | 1. n, 318 (72%)                                                                                                                                                                                                                                                                                                                    | <b>0.963</b>     | 0.037        |              |              |                | 1. n, 162 (37%)                                                                                                                                                                                                                         | <b>0.923</b>     | 0.077        |              |              |                |
| 2. n, 182 (41%)                                                                                                                                                                                                                                                                | 0.099            | <b>0.901</b> |              |              |                | 2. n, 122 (28%)                                                                                                                                                                                                                                                                                                                    | 0.058            | <b>0.942</b> |              |              |                | 2. n, 278 (63%)                                                                                                                                                                                                                         | 0.038            | <b>0.962</b> |              |              |                |
| Three-group model                                                                                                                                                                                                                                                              | 1                | 2            | 3            |              |                | Three-group model                                                                                                                                                                                                                                                                                                                  | 1                | 2            | 3            |              |                | Three-group model                                                                                                                                                                                                                       | 1                | 2            | 3            |              |                |
| 1. n, 36 (8%)                                                                                                                                                                                                                                                                  | <b>0.881</b>     | 0.119        | 0            |              |                | 1. n, 130 (30%)                                                                                                                                                                                                                                                                                                                    | <b>0.91</b>      | 0.09         | 0            |              |                | 1. n, 36 (8%)                                                                                                                                                                                                                           | <b>0.918</b>     | 0.082        | 0            |              |                |
| 2. n, 293 (67%)                                                                                                                                                                                                                                                                | 0.011            | <b>0.931</b> | 0.058        |              |                | 2. n, 240 (54%)                                                                                                                                                                                                                                                                                                                    | 0.057            | <b>0.910</b> | 0.033        |              |                | 2. n, 183 (42%)                                                                                                                                                                                                                         | 0.011            | <b>0.931</b> | 0.058        |              |                |
| 3. n, 111 (25%)                                                                                                                                                                                                                                                                | 0                | 0.123        | <b>0.877</b> |              |                | 3. n, 70 (16%)                                                                                                                                                                                                                                                                                                                     | 0                | 0.077        | <b>0.923</b> |              |                | 3. n, 221 (50%)                                                                                                                                                                                                                         | 0                | 0.060        | <b>0.940</b> |              |                |
| Four-group model                                                                                                                                                                                                                                                               | 1                | 2            | 3            | 4            |                | Four-group model                                                                                                                                                                                                                                                                                                                   | 1                | 2            | 3            | 4            |                | Four-group model                                                                                                                                                                                                                        | 1                | 2            | 3            | 4            |                |
| 1. n, 35 (8%)                                                                                                                                                                                                                                                                  | <b>0.887</b>     | 0.021        | 0.092        | 0            |                | 1. n, 105 (24%)                                                                                                                                                                                                                                                                                                                    | <b>0.91</b>      | 0.09         | 0            | 0            |                | 1. n, 17 (4%)                                                                                                                                                                                                                           | <b>0.948</b>     | 0.052        | 0            | 0            |                |
| 2. n, 20 (4%)                                                                                                                                                                                                                                                                  | 0.005            | <b>0.857</b> | 0.118        | 0.02         |                | 2. n, 222 (50%)                                                                                                                                                                                                                                                                                                                    | 0.048            | <b>0.923</b> | 0.029        | 0            |                | 2. n, 118 (27%)                                                                                                                                                                                                                         | 0.007            | <b>0.929</b> | 0.064        | 0            |                |
| 3. n, 272 (62%)                                                                                                                                                                                                                                                                | 0.011            | 0.028        | <b>0.91</b>  | 0.051        |                | 3. n, 97 (22%)                                                                                                                                                                                                                                                                                                                     | 0                | 0.067        | <b>0.926</b> | 0.006        |                | 3. n, 205 (47%)                                                                                                                                                                                                                         | 0                | 0.051        | <b>0.889</b> | 0.059        |                |
| 4. n, 113 (26%)                                                                                                                                                                                                                                                                | 0                | 0.02         | 0.088        | <b>0.892</b> |                | 4. n, 16 (4%)                                                                                                                                                                                                                                                                                                                      | 0                | 0            | 0.06         | <b>0.94</b>  |                | 4. n, 100 (23%)                                                                                                                                                                                                                         | 0                | 0            | 0.094        | <b>0.906</b> |                |
| Selected Model                                                                                                                                                                                                                                                                 |                  |              |              |              |                | Selected Model                                                                                                                                                                                                                                                                                                                     |                  |              |              |              |                | Selected Model                                                                                                                                                                                                                          |                  |              |              |              |                |
| 1. n, 36 (8%)                                                                                                                                                                                                                                                                  | <b>0.893</b>     | 0.107        | 0            |              |                | 1. n, 106 (24%)                                                                                                                                                                                                                                                                                                                    | <b>0.912</b>     | 0.088        | 0            | 0            |                | 1. n, 36 (8%)                                                                                                                                                                                                                           | <b>0.92</b>      | 0.08         | 0            |              |                |
| 2. n, 295 (67%)                                                                                                                                                                                                                                                                | 0.012            | <b>0.929</b> | 0.059        |              |                | 2. n, 222 (50%)                                                                                                                                                                                                                                                                                                                    | 0.047            | <b>0.926</b> | 0.027        | 0.000        |                | 2. n, 183 (42%)                                                                                                                                                                                                                         | 0.011            | <b>0.932</b> | 0.057        |              |                |
| 3. n, 109 (25%)                                                                                                                                                                                                                                                                | 0                | 0.115        | <b>0.885</b> |              |                | 3. n, 97 (22%)                                                                                                                                                                                                                                                                                                                     | 0                | 0.066        | <b>0.925</b> | 0.009        |                | 3. n, 221 (50%)                                                                                                                                                                                                                         | 0                | 0.062        | <b>0.938</b> |              |                |
|                                                                                                                                                                                                                                                                                |                  |              |              |              |                | 4. n, 15 (3%)                                                                                                                                                                                                                                                                                                                      | 0                | 0            | 0.044        | <b>0.956</b> |                |                                                                                                                                                                                                                                         |                  |              |              |              |                |
| Intercepts (I) and Linear, Quadratic and Cubic Slopes for Final Selected Model: G1: I = 32.74 (0.89), L = 0.24 (0.11); G2: I = 45.55 (0.42), L = -1.38 (0.29), Q = 0.17 (0.06), C = -0.006 (0.003); G3: I = 57.40 (0.73), L = -4.97 (0.50), Q = 0.62 (0.10), C = -0.02 (0.005) |                  |              |              |              |                | Intercepts (I) and Linear, Quadratic and Cubic Slopes for Final Selected Model: G1: I = 1.96 (0.04), L = -0.17 (0.03), Q=0.02 (0.006), C=-0.0009 (0.0004); G2: I = 2.34 (0.03), L = -0.09 (0.02), Q = 0.012 (0.004), C = -0.0005 (0.0002); G3: I = 2.74 (0.02); G4: I=3.44 (0.09), L=0.17 (0.08), Q=-0.03 (0.02), C=0.002 (0.0009) |                  |              |              |              |                | Intercepts (I) and Linear, Quadratic and Cubic Slopes for Final Selected Model: G1: I = 4.87 (0.08), L = -0.06 (0.03), Q=0.004 (0.002); G2: I = 5.79 (0.04), L = -0.06 (0.012), Q = 0.003 (0.001); G3: I = 6.41 (0.03), L=-0.01 (0.003) |                  |              |              |              |                |
| Shaded cells are statistics for the selected model                                                                                                                                                                                                                             |                  |              |              |              |                |                                                                                                                                                                                                                                                                                                                                    |                  |              |              |              |                |                                                                                                                                                                                                                                         |                  |              |              |              |                |
| Bold values represent the mean posterior probability values for each group within each model                                                                                                                                                                                   |                  |              |              |              |                |                                                                                                                                                                                                                                                                                                                                    |                  |              |              |              |                |                                                                                                                                                                                                                                         |                  |              |              |              |                |

**Supplemental Table S2:** Comparison of baseline characteristics of thrombosis and evolution cohorts included in multivariable Cox proportional hazards models to those excluded for loss to follow up or event within trajectory modeling period.

| <b>Thrombosis</b>                                     |                                        |                                 |
|-------------------------------------------------------|----------------------------------------|---------------------------------|
| <b>Characteristic</b>                                 | <b>Included in Trajectory Modeling</b> | <b>Included in Cox Modeling</b> |
| <b>Patients (N)</b>                                   | 440                                    | 377                             |
| <b>Age at diagnosis, years</b>                        |                                        |                                 |
| <b>Median (Min-Max)</b>                               | 58 (20-93)                             | 58 (20-93)                      |
| <b>Male, N (%)</b>                                    | 213 (48%)                              | 181 (48%)                       |
| <b>Duration of disease prior to contact, months</b>   |                                        |                                 |
| <b>Median (Min-Max)</b>                               | 2 (0-358)                              | 2 (0-358)                       |
| <b>Prior Thrombosis N(%)</b>                          | 110 (25%)                              | 93 (25%)                        |
| <b>Number of cardiovascular risk factors (median)</b> |                                        |                                 |
| <b>Diabetes, N (%)</b>                                | 45 (10%)                               | 38 (10%)                        |
| <b>Hypertension, N (%)</b>                            | 180 (41%)                              | 151 (40%)                       |
| <b>Hyperlipidemia, N (%)</b>                          | 107 (24%)                              | 90 (24%)                        |
| <b>Coronary Artery Disease, N (%)</b>                 | 41 (9%)                                | 36 (10%)                        |
| <b>History of Smoking, N (%)</b>                      | 110 (25%)                              | 97 (26%)                        |
| <b>Evolution</b>                                      |                                        |                                 |
| <b>Characteristic</b>                                 | <b>Included in Trajectory Modeling</b> | <b>Included in Cox Modeling</b> |
| <b>Patients (N, %)</b>                                | 440                                    | 378                             |
| <b>Age at diagnosis, years</b>                        |                                        |                                 |
| <b>Median (Min-Max)</b>                               | 58 (20 – 93)                           | 58 (20-93)                      |
| <b>Duration of disease (prior to contact), months</b> |                                        |                                 |
| <b>Median (Min-Max)</b>                               | 2 (0 – 358)                            | 2 (0-358)                       |

**Supplemental Table S3: Summary and distribution of baseline characteristics of patient cohorts across 12-month WBC, HCT, and PLT trajectory groups.**

**WBC and thrombosis**

| <b>Characteristic</b>                                          | <b>Overall</b> | <b>WBC5</b>   | <b>WBC10</b> | <b>WBC15</b>  | <b>WBC35</b> | <b>p</b> |
|----------------------------------------------------------------|----------------|---------------|--------------|---------------|--------------|----------|
| <b>Patients N (%)</b>                                          | 377            | 93 (25%)      | 189 (50%)    | 81 (21%)      | 14 (4%)      |          |
| <b>Age at diagnosis, years</b>                                 |                |               |              |               |              | 0.9118   |
| <b>Median (range)</b>                                          | 58 (20-93)     | 59 (22-90)    | 57 (20-93)   | 58 (22-91)    | 57 (36-75)   |          |
| <b>Gender</b>                                                  |                |               |              |               |              | 0.6132   |
| <b>Male N (%)</b>                                              | 181 (48%)      | 42 (45%)      | 89 (47%)     | 44 (54%)      | 6 (43%)      |          |
| <b>Duration of disease (prior to contact), months</b>          |                |               |              |               |              | 0.0143   |
| <b>Median (range)</b>                                          | 2 (0-358)      | 1 (0-312)     | 2 (0-358)    | 11 (0-356)    | 30 (0-165)   |          |
| <b>Prior Thrombosis N (%)</b>                                  | 93 (25%)       | 32 (34%)      | 48 (25%)     | 11 (14%)      | 2 (14%)      | 0.0119   |
| <b>Number of cardiovascular risk factors (median)</b>          | 1              | 1             | 1            | 1             | 1            |          |
| <b>Diabetes N (%)</b>                                          | 38 (10%)       | 7 (8%)        | 18 (10%)     | 11 (14%)      | 2 (14%)      | 0.5516   |
| <b>Hypertension N (%)</b>                                      | 151 (40%)      | 35 (38%)      | 76 (40%)     | 35 (43%)      | 5 (36%)      | 0.8792   |
| <b>Hyperlipidemia N (%)</b>                                    | 90 (24%)       | 20 (22%)      | 44 (23%)     | 20 (25%)      | 6 (43%)      | 0.3721   |
| <b>Coronary Artery Disease (N, %)</b>                          | 36 (10%)       | 9 (10%)       | 21 (11%)     | 5 (6%)        | 1 (7%)       | 0.6373   |
| <b>History of Smoking N (%)</b>                                | 97 (26%)       | 24 (26%)      | 44 (23%)     | 27 (33%)      | 2 (14%)      | 0.2611   |
| <b>Pack-years, median (range)</b>                              | 12 (0.3-90)    | 20 (0.3 – 60) | 15 (1-81)    | 8.25 (0.5-90) | 3 (1-5)      | 0.3827   |
| <b>Period of phlebotomy-only during trajectory period N(%)</b> | 118 (31%)      | 15 (16%)      | 69 (37%)     | 29 (36%)      | 5 (35%)      | 0.0042   |
| <b>On aspirin during trajectory period N(%)</b>                | 340 (90%)      | 85 (91%)      | 165 (87%)    | 76 (94%)      | 14 (100%)    | 0.1978   |
| <b>On hydroxyurea during trajectory period N(%)</b>            | 226 (60%)      | 61 (66%)      | 117 (62%)    | 41 (51%)      | 7 (50%)      | 0.1682   |
| <b>On Ruxolitinib during trajectory period N(%)</b>            | 40 (11%)       | 5 (5%)        | 20 (11%)     | 13 (16%)      | 2 (14%)      | 0.1440   |
| <b>On pegIFN-a2a during trajectory period N(%)</b>             | 34 (9%)        | 11 (12%)      | 19 (10%)     | 4 (5%)        | 0 (0%)       | 0.2435   |

**WBC and evolution**

| <b>Characteristic</b>                                          | <b>Overall</b> | <b>WBC5</b> | <b>WBC10</b> | <b>WBC15</b> | <b>WBC35</b> | <b>p</b> |
|----------------------------------------------------------------|----------------|-------------|--------------|--------------|--------------|----------|
| <b>Patients (N, %)</b>                                         | 378            | 94          | 193          | 80           | 11           |          |
| <b>Age at diagnosis, years</b>                                 |                |             |              |              |              | 0.9824   |
| <b>Median (range)</b>                                          | 58 (20-93)     | 59 (22-90)  | 58 (20-93)   | 59 (22-91)   | 55 (36-76)   |          |
| <b>Duration of disease (prior to contact), months</b>          |                |             |              |              |              | 0.0849   |
| <b>Median (range)</b>                                          | 2 (0-358)      | 2 (0-312)   | 1 (0-358)    | 9 (9-356)    | 41(0-151)    |          |
| <b>Period of phlebotomy-only during trajectory period N(%)</b> | 120 (32%)      | 16 (17%)    | 71 (37%)     | 29 (36%)     | 4 (36%)      | 0.0058   |
| <b>On aspirin during trajectory period N(%)</b>                | 341 (90%)      | 85 (90%)    | 170 (88%)    | 75 (94%)     | 11 (100%)    | 0.3444   |
| <b>On hydroxyurea during trajectory period N(%)</b>            | 223 (59%)      | 61 (65%)    | 119 (62%)    | 39 (49%)     | 4 (36%)      | 0.0522   |
| <b>On Ruxolitinib during trajectory period N(%)</b>            | 38 (10%)       | 5 (5%)      | 20 (10%)     | 12 (15%)     | 1 (9%)       | 0.2099   |
| <b>On pegIFN-a2a during trajectory period N(%)</b>             | 34 (9%)        | 11 (12%)    | 19 (10%)     | 4 (5%)       | 0 (0%)       | 0.3007   |

**Hematocrit and thrombosis**

| <b>Characteristic</b> | <b>Overall</b> | <b>HCT35</b> | <b>HCT43</b> | <b>HCT47</b> | <b>p</b> |
|-----------------------|----------------|--------------|--------------|--------------|----------|
| <b>Patients N (%)</b> | 377            | 28 (7%)      | 256 (68%)    | 93 (25%)     |          |

|                                                                |                |               |               |               |                   |
|----------------------------------------------------------------|----------------|---------------|---------------|---------------|-------------------|
| <b>Age at diagnosis, years</b>                                 |                |               |               |               | <i>0.0304</i>     |
| <b>Median (range)</b>                                          | 58 (20-93)     | 56 (24-82)    | 57 (20-93)    | 62 (21-91)    |                   |
| <b>Gender</b>                                                  |                |               |               |               | <i>&lt;0.0001</i> |
| <b>Male N (%)</b>                                              | 181 (48%)      | 4 (14%)       | 110 (43%)     | 67 (72%)      |                   |
| <b>Duration of disease (prior to contact), months</b>          |                |               |               |               | <i>&lt;0.0001</i> |
| <b>Median (range)</b>                                          | 2 (0-358)      | 48 (0-237)    | 6 (0-358)     | 0 (0-163)     |                   |
| <b>Prior Thrombosis N (%)</b>                                  | 93 (25%)       | 11 (39%)      | 66 (26%)      | 16 (17%)      | <i>0.0455</i>     |
| <b>Number of cardiovascular risk factors (median)</b>          | 1              | 0             | 1             | 1             |                   |
| <b>Diabetes N (%)</b>                                          | 38 (10%)       | 2 (7%)        | 26 (10%)      | 10 (11%)      | <i>0.8545</i>     |
| <b>Hypertension N (%)</b>                                      | 151 (40%)      | 10 (36%)      | 95 (37%)      | 46 (50%)      | <i>0.1016</i>     |
| <b>Hyperlipidemia N (%)</b>                                    | 90 (24%)       | 4 (14%)       | 63 (25%)      | 23 (25%)      | <i>0.4653</i>     |
| <b>Coronary Artery Disease N (%)</b>                           | 36 (10%)       | 3 (11%)       | 24 (9%)       | 9 (10%)       | <i>0.9730</i>     |
| <b>History of Smoking N (%)</b>                                | 97 (26%)       | 5 (18%)       | 65 (25%)      | 27 (29%)      | <i>0.4833</i>     |
| <b>Pack-years, median (range)</b>                              | 12 (0.3-90)    | 13.75 (0-30)  | 12 (0-81)     | 12.5 (0-90)   | <i>0.7959</i>     |
| <b>Period of phlebotomy-only during trajectory period N(%)</b> | 118 (31%)      | 4 (14%)       | 77 (30%)      | 37 (40%)      | <i>0.0293</i>     |
| <b>On aspirin during trajectory period N(%)</b>                | 340 (90%)      | 26 (93%)      | 232 (91%)     | 82 (88%)      | <i>0.7020</i>     |
| <b>On hydroxyurea during trajectory period N(%)</b>            | 226 (60%)      | 17 (61%)      | 148 (58%)     | 61 (66%)      | <i>0.4218</i>     |
| <b>On Ruxolitinib during trajectory period N(%)</b>            | 40 (11%)       | 4 (14%)       | 25 (10%)      | 11 (12%)      | <i>0.6918</i>     |
| <b>On pegIFN-a2a during trajectory period N(%)</b>             | 34 (9%)        | 2 (7%)        | 24 (9%)       | 8 (9%)        | <i>0.9142</i>     |
| <b>Hematocrit and evolution</b>                                |                |               |               |               |                   |
| <b>Characteristic</b>                                          | <b>Overall</b> | <b>HCT35</b>  | <b>HCT43</b>  | <b>HCT45</b>  | <b>p</b>          |
| <b>Patients N (%)</b>                                          | 378            | 21 (5%)       | 261 (69%)     | 96 (25%)      |                   |
| <b>Age at diagnosis, years</b>                                 |                |               |               |               | <i>0.0387</i>     |
| <b>Median (range)</b>                                          | 58 (20-93)     | 57 (24-82)    | 58 (20-93)    | 62 (21-91)    |                   |
| <b>Duration of disease (prior to contact), months</b>          |                |               |               |               | <i>&lt;0.0001</i> |
| <b>Median (range)</b>                                          | 2 (0-358)      | 13 (0-167)    | 6 (0-358)     | 0 (0-163)     |                   |
| <b>Period of phlebotomy-only during trajectory period N(%)</b> | 120 (32%)      | 3 (14%)       | 78 (30%)      | 39 (41%)      | <i>0.0323</i>     |
| <b>On aspirin during trajectory period N(%)</b>                | 341 (90%)      | 20 (95%)      | 237 (91%)     | 84 (88%)      | <i>0.4714</i>     |
| <b>On hydroxyurea during trajectory period N(%)</b>            | 223 (59%)      | 11 (52%)      | 150 (57%)     | 62 (65%)      | <i>0.3927</i>     |
| <b>On Ruxolitinib during trajectory period N(%)</b>            | 38 (10%)       | 3 (14%)       | 25 (10%)      | 10 (10%)      | <i>0.7807</i>     |
| <b>On pegIFN-a2a during trajectory period N(%)</b>             | 34 (9%)        | 2 (10%)       | 24 (9%)       | 8 (8%)        | <i>0.9650</i>     |
| <b>Platelet and thrombosis</b>                                 |                |               |               |               |                   |
| <b>Characteristic</b>                                          | <b>Overall</b> | <b>PLT125</b> | <b>PLT300</b> | <b>PLT600</b> | <b>p</b>          |
| <b>Patients N (%)</b>                                          | 377            | 33 (9%)       | 158 (42%)     | 186 (49%)     |                   |
| <b>Age at diagnosis, years</b>                                 |                |               |               |               | <i>0.0004</i>     |
| <b>Median (range)</b>                                          | 58 (20-93)     | 57 (36-87)    | 63 (21-93)    | 54 (20-91)    |                   |
| <b>Gender</b>                                                  |                |               |               |               | <i>0.0292</i>     |
| <b>Male N (%)</b>                                              | 181 (48%)      | 20 (61%)      | 84 (53%)      | 77 (41%)      |                   |
| <b>Duration of disease (prior to contact), months</b>          |                |               |               |               | <i>0.3204</i>     |
| <b>Median (range)</b>                                          | 2 (0-358)      | 16 (0-232)    | 1 (0-356)     | 3 (0-358)     |                   |
| <b>Prior Thrombosis N (%)</b>                                  | 93 (25%)       | 8 (24%)       | 45 (28%)      | 40 (22%)      | <i>0.3262</i>     |
| <b>Number of cardiovascular risk factors (median)</b>          | 1              | 1             | 1             | 1             |                   |
| <b>Diabetes N (%)</b>                                          | 38 (10%)       | 3 (9%)        | 15 (9%)       | 20 (11%)      | <i>0.9101</i>     |
| <b>Hypertension N (%)</b>                                      | 151 (40%)      | 15 (45%)      | 67 (42%)      | 69 (37%)      | <i>0.4863</i>     |
| <b>Hyperlipidemia N (%)</b>                                    | 90 (24%)       | 9 (27%)       | 43 (27%)      | 38 (20%)      | <i>0.3021</i>     |

|                                                                |                |               |                |               |          |
|----------------------------------------------------------------|----------------|---------------|----------------|---------------|----------|
| <b>Coronary Artery Disease N (%)</b>                           | 36 (10%)       | 3 (9%)        | 20 (13%)       | 13 (7%)       | 0.2032   |
| <b>History of Smoking N (%)</b>                                | 97 (26%)       | 10 (30%)      | 50 (32%)       | 37 (20%)      | 0.0374   |
| <b>Pack-years, median (range)</b>                              | 12.5           | 12 (1-40)     | 13.75 (0.3-90) | 12 (0.5-45)   | 0.2269   |
| <b>Period of phlebotomy-only during trajectory period N(%)</b> | 118 (31%)      | 10 (30%)      | 44 (28%)       | 64 (34%)      | 0.4218   |
| <b>On aspirin during trajectory period N(%)</b>                | 340 (90%)      | 30 (91%)      | 140 (89%)      | 170 (91%)     | 0.6795   |
| <b>On hydroxyurea during trajectory period N(%)</b>            | 226 (60%)      | 21 (64%)      | 102 (65%)      | 103 (55%)     | 0.2015   |
| <b>On Ruxolitinib during trajectory period N(%)</b>            | 40 (11%)       | 4 (12%)       | 13 (8%)        | 23 (12%)      | 0.4428   |
| <b>On pegIFN-a2a during trajectory period N(%)</b>             | 34 (9%)        | 4 (12%)       | 11 (7%)        | 19 (10%)      | 0.4662   |
| <b>Platelet and evolution</b>                                  |                |               |                |               |          |
| <b>Characteristic</b>                                          | <b>Overall</b> | <b>PLT125</b> | <b>PLT300</b>  | <b>PLT600</b> | <b>p</b> |
| <b>Patients N (%)</b>                                          | 378            | 26 (7%)       | 157 (41%)      | 195 (52%)     |          |
| <b>Age at diagnosis, years</b>                                 |                |               |                |               | 0.0009   |
| <b>Median (range)</b>                                          | 58 (20-93)     | 58 (36-87)    | 63 (21-93)     | 55 (20-91)    |          |
| <b>Duration of disease (prior to contact), months</b>          |                |               |                |               | 0.2854   |
| <b>Median (range)</b>                                          | 2 (0-358)      | 4 (0-177)     | 1 (0-356)      | 4 (0-358)     |          |
| <b>Period of phlebotomy-only during trajectory period N(%)</b> | 120 (32%)      | 8 (31%)       | 45 (29%)       | 67 (34%)      | 0.5182   |
| <b>On aspirin during trajectory period N(%)</b>                | 341 (90%)      | 25 (96%)      | 138 (88%)      | 178 (91%)     | 0.3256   |
| <b>On hydroxyurea during trajectory period N(%)</b>            | 223 (59%)      | 19 (73%)      | 102 (65%)      | 102 (52%)     | 0.0178   |
| <b>On Ruxolitinib during trajectory period N(%)</b>            | 38 (10%)       | 3 (12%)       | 13 (8%)        | 22 (11%)      | 0.6266   |
| <b>On pegIFN-a2a during trajectory period N(%)</b>             | 34 (9%)        | 4 (15%)       | 11 (7%)        | 19 (10%)      | 0.3347   |

**Supplemental Table S4:** Survival analysis examining association between CBC trajectories and hazard of thrombosis with exclusion of patients experiencing superficial thrombotic events.

| Thrombosis                  |              |                               |                          |        |           |
|-----------------------------|--------------|-------------------------------|--------------------------|--------|-----------|
|                             | Event Rate   | Median time-to-event (months) | HR <sup>1</sup> [95% CI] | p      | Overall p |
| <b>Leukocyte trajectory</b> |              |                               |                          |        |           |
| <b>WBC5</b>                 | 4/92 (4%)    | 24.4                          | Reference                |        | 0.3128    |
| <b>WBC10</b>                | 21/189 (11%) | 35.0                          | 2.75 [0.92-8.18]         | 0.0696 |           |
| <b>WBC15</b>                | 5/79 (6%)    | 32.0                          | 1.86 [0.48-7.15]         | 0.3694 |           |
| <b>WBC35</b>                | 1/14 (7%)    | 24.1                          | 2.91 [0.30-27.96]        | 0.3544 |           |
| <b>Overall</b>              | 31/374 (9%)  |                               |                          |        |           |
| <b>HCT Trajectory</b>       |              |                               |                          |        |           |
| <b>HCT35</b>                | 3/28 (11%)   | 34.8                          | 0.99 [0.23-4.31]         | 0.9937 | 0.1820    |
| <b>HCT43</b>                | 16/254 (6%)  | 29.8                          | 0.50 [0.22-1.14]         | 0.1009 |           |
| <b>HCT47</b>                | 12/92 (13%)  | 29.1                          | Reference                |        |           |
| <b>Overall</b>              | 31/374 (9%)  |                               |                          |        |           |
| <b>PLT Trajectory</b>       |              |                               |                          |        |           |
| <b>PLT125</b>               | 3/32 (9%)    | 26.6                          | Reference                |        | 0.8444    |
| <b>PLT300</b>               | 13/157 (8%)  | 32.0                          | 0.71 [0.20-2.55]         | 0.6034 |           |
| <b>PLT600</b>               | 15/185 (8%)  | 31.7                          | 0.85 [0.24-3.00]         | 0.7961 |           |
| <b>Overall</b>              | 31/374 (9%)  |                               |                          |        |           |

<sup>1</sup> Multivariable HR adjusted for age at diagnosis, sex, duration of disease at time of institutional contact, sum of cardiovascular risk factors (diabetes, hypertension, hyperlipidemia, coronary artery disease, smoking), and whether or not the patient was on cytoreductive therapy (hydroxyurea, PEGinterferon-alfa, or Ruxolitinib) at some point during landmark trajectory modeling period.
